# Supplementary material for: Localised Ag+ vibrations at the origin of ultralow thermal conductivity in layered thermoelectric AgCrSe2
Source: PubMed Central journal article supplement (PMC4802330; doi:10.1038/srep23415), 2016-03-22

# Localised Ag<sup>+</sup> vibrations at the origin of ultralow thermal conductivity in layered thermoelectric AgCrSe<sub>2</sub>

F. Damay<sup>1</sup>, S. Petit<sup>1</sup>, S. Rols<sup>2</sup>, M. Braendlein<sup>1</sup>, R. Daou<sup>3</sup>, E. Elkaïm<sup>4</sup>, F. Fauth<sup>5</sup>, F. Gascoin<sup>3</sup>, C. Martin<sup>3</sup> and A. Maignan<sup>3</sup>

Supplementary material

Table S1: Rietveld refinement results of high resolution synchrotron X-ray powder diffractogram of AgCrSe<sub>2</sub> at 295 K and 80 K (space group *R3m* (n°160, H setting) with all atoms on Wyckoff position *3a* (0, 0, *z*)).

| Temperature                                       | 295 K       | 80 K         |
|---------------------------------------------------|-------------|--------------|
| Cell parameters (Å)                               |             |              |
| <i>a</i>                                          | 3.6836(2)   | 3.6844(2)    |
| <i>c</i>                                          | 21.2375(12) | 21.11561(10) |
| Cell volume <i>V</i> (Å <sup>3</sup> )            | 249.6(2)    | 248.2(2)     |
| Ag (0, 0, <i>z</i> )                              | 0.1529(3)   | 0.1513(2)    |
| Cr (0, 0, <i>z</i> )                              | 0           | 0            |
| Se <sub>1</sub> (0, 0, <i>z</i> )                 | 0.2713(3)   | 0.2709(3)    |
| Se <sub>2</sub> (0, 0, <i>z</i> )                 | 0.7337(3)   | 0.7336(3)    |
| <i>U</i> <sub>anisotropic</sub> (Å <sup>2</sup> ) |             |              |
| Ag <i>U</i> <sub>11</sub>                         | 0.081(6)    | 0.016(7)     |
| Ag <i>U</i> <sub>33</sub>                         | 0.004(2)    | 0.010(3)     |
| Nb. of reflections                                | 63          | 63           |
| Nb. of parameters                                 | 17          | 17           |
| Bragg R factor                                    | 3.88        | 4.28         |
| $\chi^2$                                          | 2.04        | 3.18         |

Table S2: Selected inter-atomic distances and angles in AgCrSe<sub>2</sub> at 295 K and 80 K (from high resolution synchrotron X-ray powder diffractograms).

| Temperature                                     | 295 K          | 80 K      |
|-------------------------------------------------|----------------|-----------|
| Distances (Å)                                   |                |           |
| Ag-Se <sub>1</sub>                              | 2.5162(1) (x1) | 2.5284(1) |
| Ag-Se <sub>2</sub>                              | 2.8025(4) (x3) | 2.7792(4) |
| Cr-Se <sub>1</sub>                              | 2.4970(5) (x3) | 2.5005(3) |
| Cr-Se <sub>2</sub>                              | 2.5624(5) (x3) | 2.5505(5) |
| Cr-Cr <sub>in</sub>                             | 3.6836(2) (x6) | 3.6844(1) |
| Cr-Cr <sub>out</sub>                            | 7.3918(4) (x6) | 7.3530(4) |
| Cr-Cr <sub>in</sub> (2 <sup>nd</sup> neighbour) | 6.380(1) (x6)  | 6.381(1)  |
| CrSe <sub>2</sub> layer thickness (Å)           | 2.738(1)       | 2.721(1)  |
| AgSe <sub>4</sub> height (Å)                    | 4.341(1)       | 4.317(1)  |
| Angles (°)                                      |                |           |
| Se-Cr-Se <sub>in</sub>                          | 91.91(3)       | 92.49(3)  |
| Se-Cr-Se <sub>out</sub>                         | 86.49(3)       | 86.29(3)  |
| S-Ag-S                                          | 130.63(3)      | 130.06(3) |

Figure S1 : (Left) Total (black) and partial (red : Ag, blue : Cr, magenta : Se) simulated structure factors obtained from the ab-initio molecular dynamics calculations at 150 K. (Right) Partial density of state for the Ag atoms, projected along the [110] axis (« in plane » vibrations, in blue), and along the [001] direction (« out of plane » vibrations, in red).

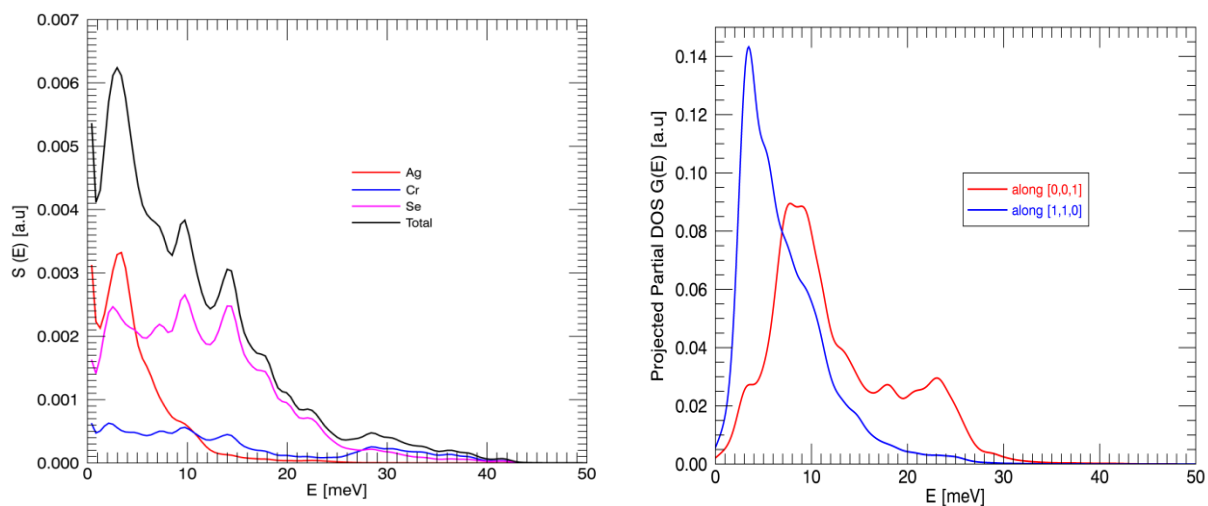

Figure S2 : Temperature evolution of the  $\text{AgCrSe}_2$  cell parameter  $a$  and cell volume  $V$ . The red line is a Debye fit, and the blue line is a guide to the eye.

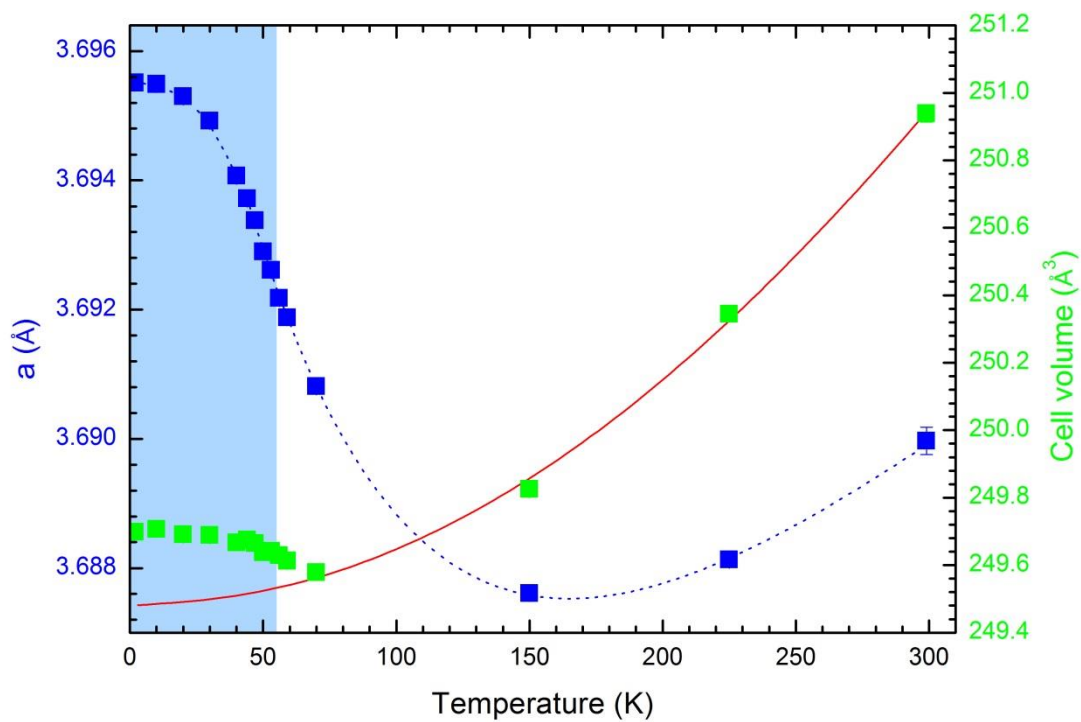

Figure S3 : Spin-wave calculation performed modelling the incommensurate magnetic structure of  $\text{AgCrSe}_2$  at 2 K, with the following magnetic exchange values:  $J_{ab} \sim 2.1$  meV,  $J_{NN} \sim -0.71$  meV and  $J_C \sim -0.09$  meV (see text for definition of  $J$ 's).

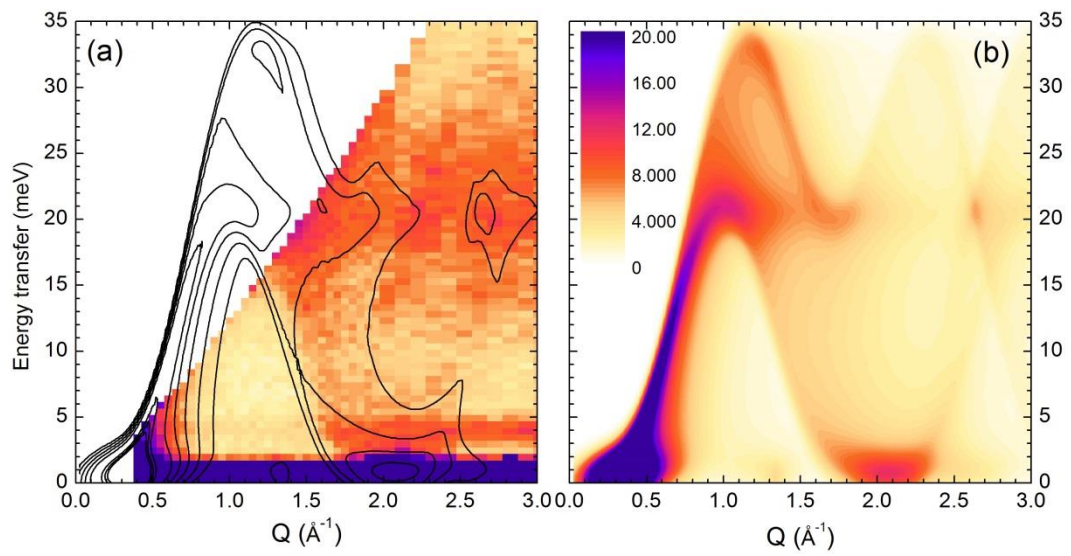

Figure S4 : Dynamical properties of  $\text{AgCrS}_2$ . The red arrow indicates the localised mode attributed to the in-plane vibration of  $\text{Ag}^+$ .

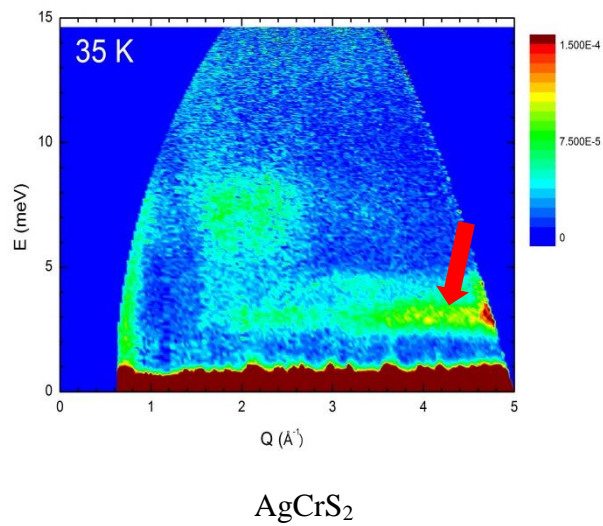

Supplement: srep23415-s1.pdf [file srep23415-s1.pdf]
